# Supplementary material for: Stress-induced phase-alteration in solution processed indium selenide thin films during annealing
Source: Royal Society of Chemistry journal article supplement (doi:10.1039/d1ra01403j), 2021-01-01
Supplement: d1ra01403j1.pdf [file d1ra01403j1.pdf]

## Supporting Information

### **Stress-induced phase-alteration in solution processed indium selenide thin films during annealing**

Bipanko Kumar Mondal<sup>1</sup>, Shaikh Khaled Mostaque<sup>1</sup>, Md. Ariful Islam<sup>2</sup> and Jaker Hossain<sup>1\*</sup>

*<sup>1</sup>Solar Energy Laboratory, Department of Electrical and Electronic Engineering, University of Rajshahi, Rajshahi 6205, Bangladesh.*

*<sup>2</sup>Department of Physics, Rajshahi University of Engineering and Technology, Rajshahi 6204, Bangladesh.*

#### **Corresponding Authors**

\*E-mail: jak\_apee@ru.ac.bd

**Table S1:** Crystallite size and Dislocation densities of synthesized  $\text{In}_3\text{Se}_2$  and  $\text{In}_2\text{Se}_3$  thin films.

| Phase                    | Annealing temperature (°C) | Planes (hkl) | FWHM, $\beta$ (Rad) $\times 10^{-3}$ | Crystallite Size, D (nm) | Dislocation density, $\delta$ (lin/m <sup>2</sup> ) $\times 10^{14}$ |
|--------------------------|----------------------------|--------------|--------------------------------------|--------------------------|----------------------------------------------------------------------|
| $\text{In}_3\text{Se}_2$ | 250                        | 004          | 1.75                                 | 84.58                    | 1.40                                                                 |
|                          |                            | 006          | 2.44                                 | 61.83                    | 2.62                                                                 |
|                          |                            | 105          | 3.49                                 | 44.04                    | 5.16                                                                 |
|                          |                            | 008          | 3.90                                 | 40.60                    | 6.07                                                                 |
|                          |                            | 0012         | 3.14                                 | 55.52                    | 3.24                                                                 |
|                          | 300                        | 004          | 1.75                                 | 84.58                    | 1.40                                                                 |
|                          |                            | 006          | 3.14                                 | 48.09                    | 4.33                                                                 |
|                          |                            | 105          | 5.06                                 | 30.37                    | 10.85                                                                |
|                          |                            | 008          | 5.94                                 | 26.27                    | 14.49                                                                |
|                          |                            | 0012         | 3.14                                 | 55.52                    | 3.24                                                                 |
|                          | 350                        | 004          | 2.96                                 | 49.75                    | 4.04                                                                 |
|                          |                            | 006          | 3.50                                 | 43.28                    | 5.34                                                                 |
|                          |                            | 105          | 3.14                                 | 48.90                    | 4.18                                                                 |
|                          |                            | 008          | 4.36                                 | 35.79                    | 7.81                                                                 |
|                          |                            | 110          | 2.44                                 | 64.24                    | 2.42                                                                 |
| 0012                     |                            | 3.14         | 55.55                                | 3.24                     |                                                                      |
| $\text{In}_2\text{Se}_3$ | 300                        | 104          | 4.02                                 | 36.85                    | 7.36                                                                 |
|                          |                            | 111          | 4.02                                 | 37.01                    | 7.30                                                                 |
|                          |                            | 112          | 2.62                                 | 56.86                    | 3.09                                                                 |
|                          |                            | 200          | 2.97                                 | 50.43                    | 3.93                                                                 |
|                          |                            | 106          | 3.49                                 | 43.12                    | 5.38                                                                 |
|                          |                            | 306          | 4.89                                 | 33.08                    | 9.14                                                                 |
|                          | 350                        | 112          | 2.62                                 | 56.88                    | 3.09                                                                 |
|                          |                            | 113          | 5.59                                 | 26.77                    | 14.0                                                                 |
|                          |                            | 203          | 2.79                                 | 53.98                    | 3.43                                                                 |
|                          |                            | 306          | 4.71                                 | 34.29                    | 8.50                                                                 |
|                          |                            | 313          | 6.63                                 | 24.69                    | 16.40                                                                |

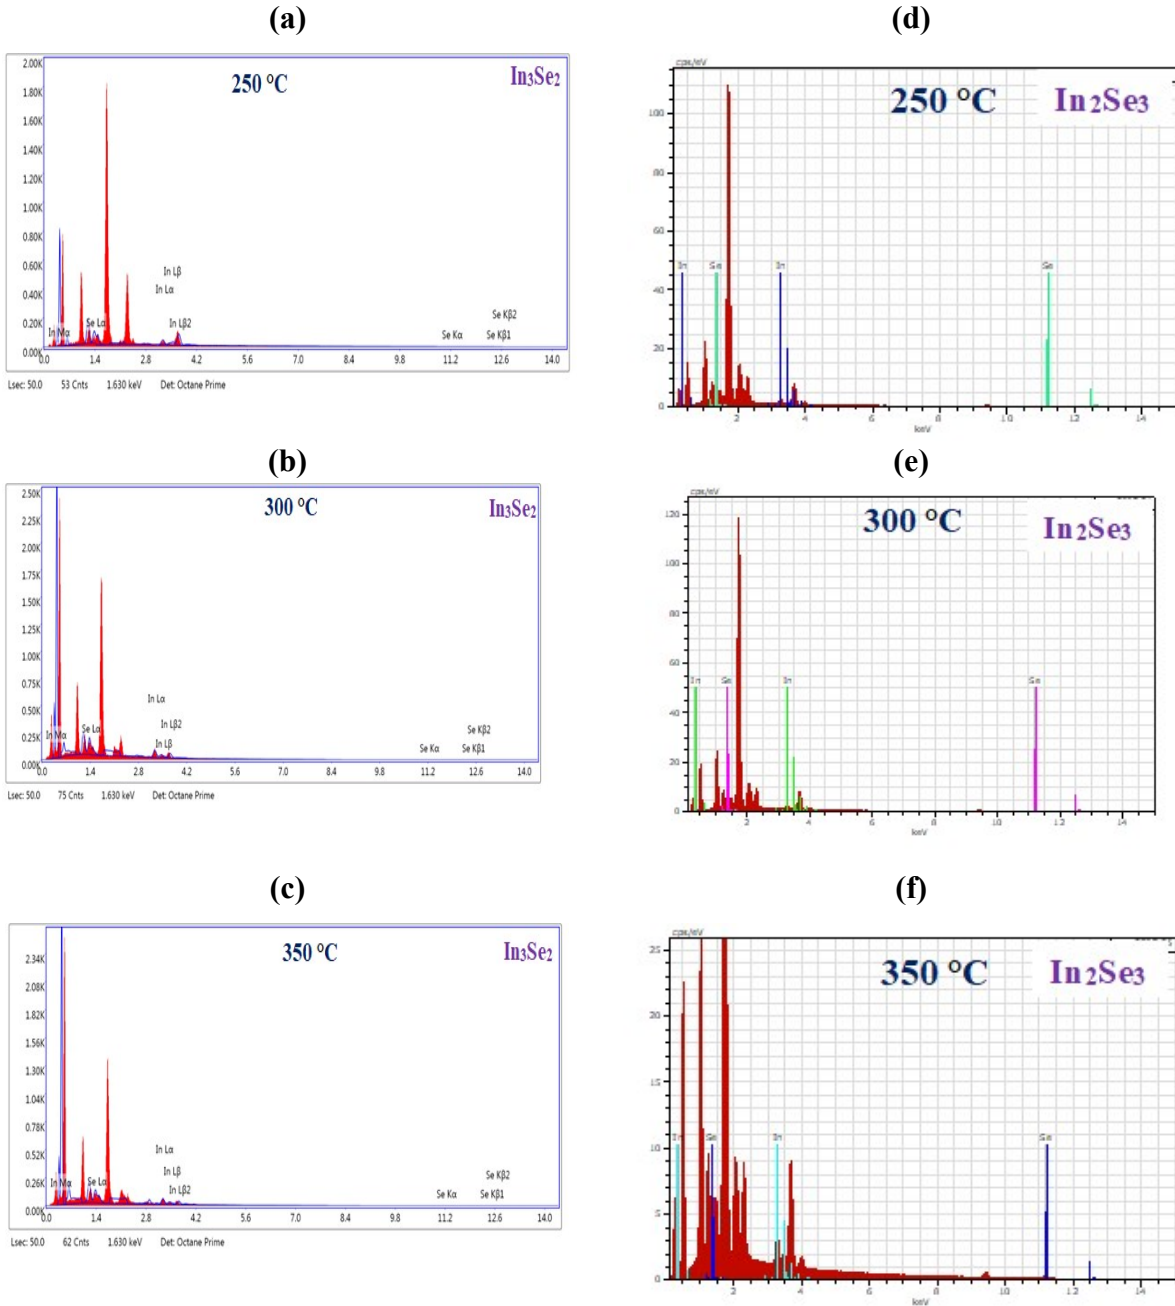

**Fig. S1.** The EDS spectra of  $\text{In}_3\text{Se}_2$  and  $\text{In}_2\text{Se}_3$  thin film deposited by spin coating method using thiol-amine cosolvents.

(a) 250 °C

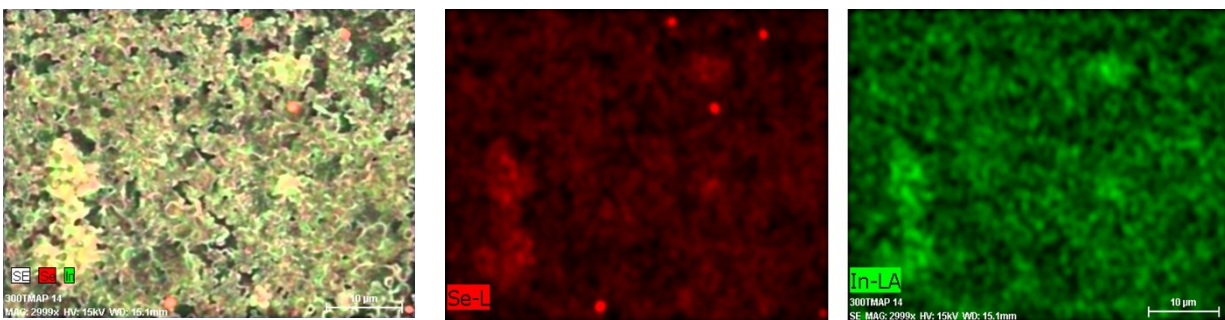

(b) 300 °C

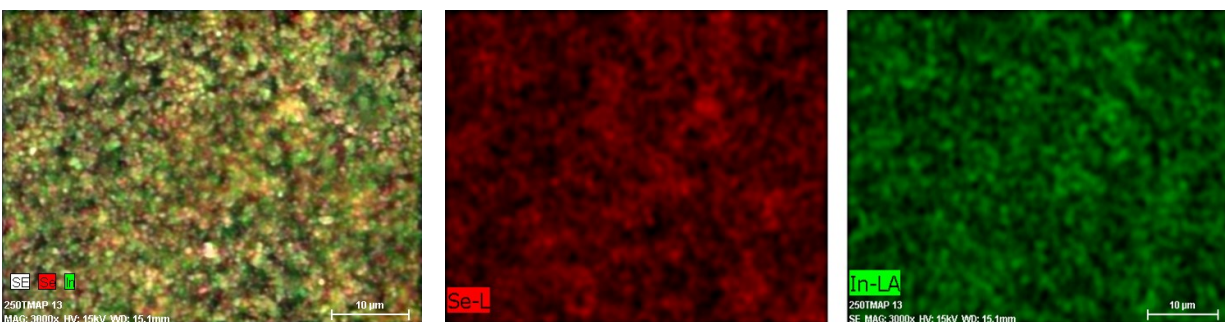

(c) 350 °C

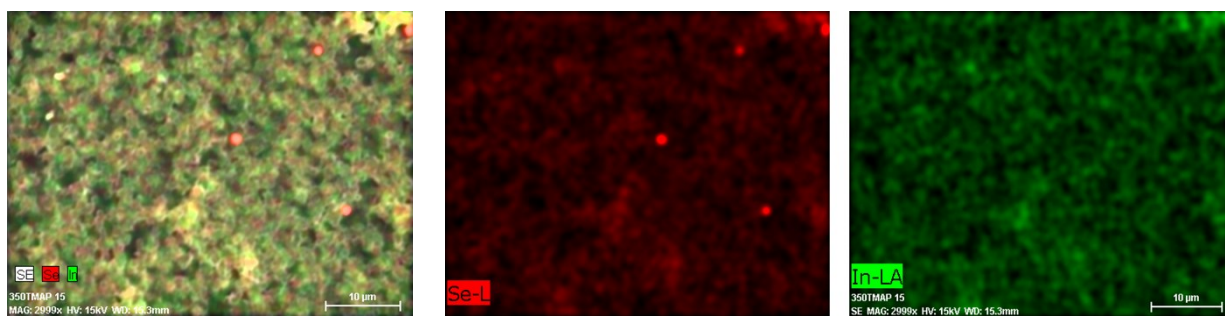

**Fig. S2.** EDS mapping of  $\text{In}_2\text{Se}_3$  thin films deposited by spin coating method using thiol-amine cosolvents.

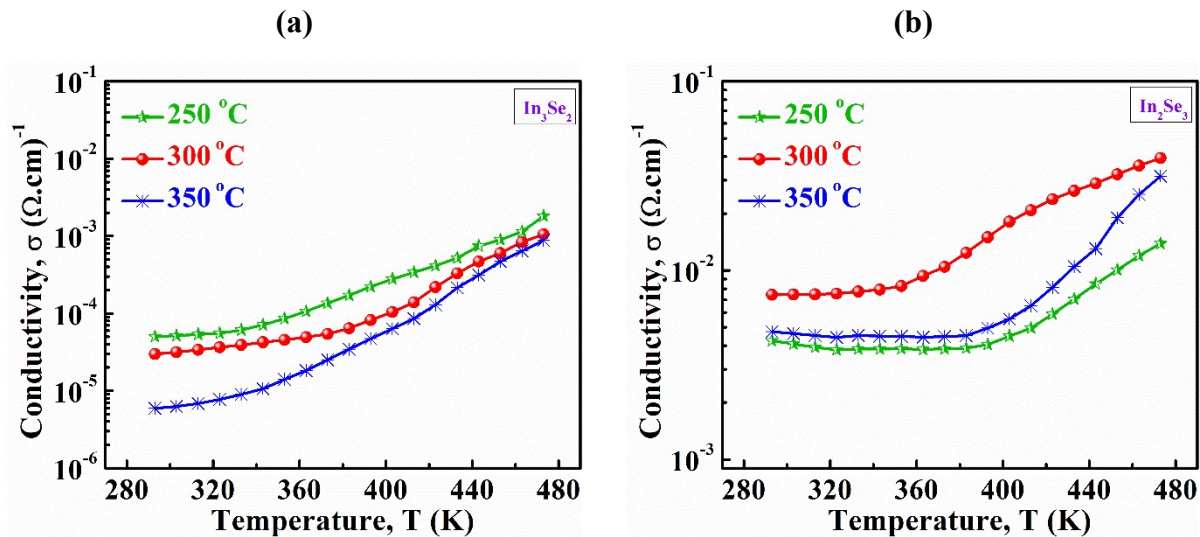

**Fig. S3.** The electrical study (a-b) temperature dependent conductivity of  $\text{In}_3\text{Se}_2$  and  $\text{In}_2\text{Se}_3$  thin films, respectively deposited by spin coating method using thiol-amine cosolvents.

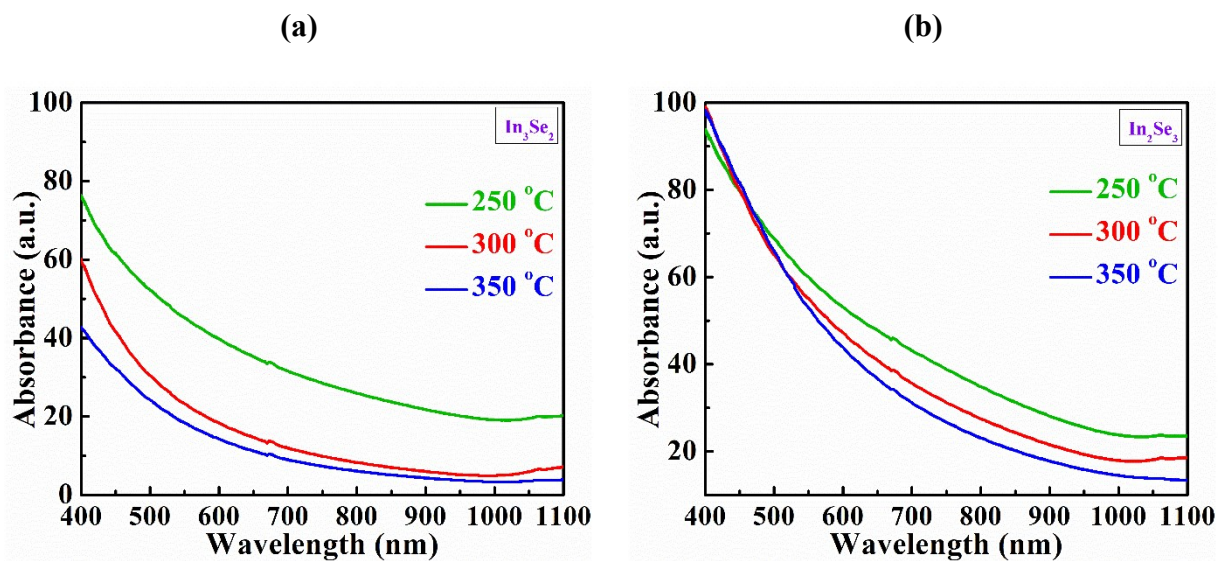

**Fig. S4.** The (a-b) optical absorbance spectra of spin coated  $\text{In}_3\text{Se}_2$  and  $\text{In}_2\text{Se}_3$  thin films, respectively prepared using thiol-amine co-solvents
